# Supplementary material for: The Wearable Cardioverter-Defibrillator: Experience in 153 Patients and a Long-Term Follow-Up
Source: PubMed Central journal article supplement (PMC7141506; doi:10.3390/jcm9030893), 2020-03-24
Supplement: jcm-09-00893-s001.pdf [file jcm-09-00893-s001.pdf]

Table S1. Characteristics of patients with appropriate WCD shocks.

| Sex    | Age | WCD Indication     | LVEF at baseline | Days till WCD shock | Type of arrhythmia | WCD Shock successful | ICD implant. | Death during 3 yr follow up | Arrythmia during Follow up/ type of arrhythmia | ICD shocks |
|--------|-----|--------------------|------------------|---------------------|--------------------|----------------------|--------------|-----------------------------|------------------------------------------------|------------|
| male   | 66  | ICM                | 35               | 62                  | VT                 | yes                  | yes          | no                          | VT                                             | yes        |
| female | 31  | Myocarditis        | 53               | 37                  | VT                 | yes                  | yes          | no                          | no                                             |            |
| male   | 48  | ICD-Explant. (ICM) | 30               | 56                  | VT                 | yes                  | yes          | no                          | no                                             |            |
| male   | 53  | ICM                | 25               | 2                   | VF                 | yes                  | yes          | no                          | no                                             |            |
| male   | 64  | ICM                | 35               | 64                  | VT                 | yes                  | yes          | no                          | VT                                             | yes        |
| male   | 75  | ICM                | 20               | 151                 | VT                 | yes                  | yes          | no                          | no                                             |            |

WCD= wearable cardioverter-defibrillator, ICD= implanted cardioverter-defibrillator, LVEF = left ventricular function (%), VT= ventricular tachycardia;

VF= ventricular fibrillation, ICM = ischemic cardiomyopathy, NICM = non-ischemic cardiomyopathy

Table S2. Characteristics of patients with appropriate ICD shocks.

| Sex | Age | Indication WCD   | LVEF at baseline | improved LVEF after 6-12 months (>35%) | Shock while WCD | Type of arrhythmia | ICD shocks | Death during follow up |
|-----|-----|------------------|------------------|----------------------------------------|-----------------|--------------------|------------|------------------------|
| M   | 66  | ICM              | 35               | yes                                    | yes             | VT                 | y          | n                      |
| M   | 63  | ICM              | 30               | no                                     | no              | VT                 | y          | n                      |
| M   | 79  | ICM              | 25               | no                                     | no              | VT                 | y          | n                      |
| M   | 54  | NICM/Myocarditis | 15               | yes                                    | no              | VT                 | n          | n                      |
| M   | 65  | NICM             | 25               | yes                                    | no              | VT                 | y          | n                      |
| M   | 64  | ICM              | 35               | unknown                                | yes             | VT                 | y          | n                      |
| M   | 65  | ICM              | 35               | no                                     | no              | VT                 | y          | n                      |
| M   | 74  | ICD-Explant.     | 30               | no                                     | no              | VT                 | y          | n                      |

WCD= wearable cardioverter-defibrillator; LVEF = left ventricular function (%); ICD= implanted cardioverter-defibrillator;

ICM = ischemic cardiomyopathy, NICM = non-ischemic cardiomyopathy; VT= ventricular tachycardia.

**Table S3.** Characteristics and variables of patients and frequencies for death.

| <b>Variables</b>                                  | <b>death,<br/>n = 15</b> | <b>no death,<br/>n = 134</b> |
|---------------------------------------------------|--------------------------|------------------------------|
| Age in years, mean $\pm$ SD                       | 71 $\pm$ 12              | 59 $\pm$ 13                  |
| Male, n (%)                                       | 11 (73)                  | 105 (78)                     |
| WCD wear days, mean $\pm$ SD                      | 40 $\pm$ 26              | 68 $\pm$ 43                  |
| Former significant VT/VF* event prior to WCD* use | 6 (40)                   | 19 (14)                      |
| Arrhythmic episodes during WCD use, n (%)         | 0 (0)                    | 6 (4)                        |
| LGE*, n (%)                                       | 2 (13)                   | 57 (43)                      |
| LVEF* at baseline, mean $\pm$ SD                  | 29 $\pm$ 14              | 29 $\pm$ 10                  |
| Elevated BNP at baseline, mean $\pm$ SD           | 7461 $\pm$ 6074          | 7778 $\pm$ 28160             |
| QRS at baseline, mean $\pm$ SD                    | 138 $\pm$ 42             | 107 $\pm$ 28                 |
| QTc at baseline, mean $\pm$ SD                    | 480 $\pm$ 48             | 458 $\pm$ 56                 |
| PQ-time at baseline, mean $\pm$ SD                | 168 $\pm$ 16             | 165 $\pm$ 27                 |
| History of CAD*, n (%)                            | 10 (67)                  | 51 (38)                      |
| Dialysis as comorbidity, n (%)                    | 6 (40)                   | 14 (10)                      |
| Risk factor Diabetes, n (%)                       | 7 (47)                   | 24 (18)                      |
| Risk factor Hypertension, n (%)                   | 12 (80)                  | 72 (54)                      |
| Risk factor Active smoker, n (%)                  | 4 (27)                   | 61 (46)                      |
| Risk factor Lipidemia, n (%)                      | 11 (73)                  | 55 (41)                      |
| Risk factor Overweight, n (%)                     | 9 (60)                   | 95 (71)                      |
| Family history of CVD*, n (%)                     | 1 (7)                    | 40 (30)                      |
| ACE* inhibitors, n (%)                            | 14 (93)                  | 117 (87)                     |
| Aldosterone antagonists, n (%)t                   | 7 (47)                   | 78 (58)                      |
| Betablockers, n (%)                               | 15 (100)                 | 128 (96)                     |

\*VT, ventricular tachycardia; VF, ventricular fibrillation; WCD, wearable cardioverter defibrillator; LGE, late gadolinium enhancement; LVEF, left ventricular ejection fraction; CAD, cardiac artery disease; CVD, cardiovascular disease; ACE, angiotensin converting enzyme

**Table S4.** Characteristics and variables of patients and frequencies for shocks.

|                                                   | <b>Patients with shocks,<br/>n = 8</b> | <b>Patients without shocks,<br/>n = 54</b> |
|---------------------------------------------------|----------------------------------------|--------------------------------------------|
| Age in years, mean $\pm$ SD                       | 67 $\pm$ 7                             | 60 $\pm$ 14                                |
| Male, n (%)                                       | 8 (100)                                | 41 (76)                                    |
| WCD wear days, mean $\pm$ SD                      | 63 $\pm$ 32                            | 65 $\pm$ 41                                |
| Former significant VT/VF* event prior to WCD* use | 1 (13)                                 | 12 (22)                                    |
| Arrhythmic episodes during WCD use, n (%)         | 2 (25)                                 | 4 (7)                                      |
| LGE*, n (%)                                       | 5 (63)                                 | 16 (30)                                    |
| LVEF* at baseline, mean $\pm$ SD                  | 29 $\pm$ 7                             | 29 $\pm$ 11                                |
| Elevated BNP at baseline, mean $\pm$ SD           | 4001 $\pm$ 2628                        | 8264 $\pm$ 28892                           |
| QRS at baseline, mean $\pm$ SD                    | 117 $\pm$ 35                           | 108 $\pm$ 30                               |
| QTc at baseline, mean $\pm$ SD                    | 405 $\pm$ 141                          | 462 $\pm$ 44                               |
| PQ-time at baseline, mean $\pm$ SD                | 176 $\pm$ 30                           | 164 $\pm$ 26                               |
| History of CAD*, n (%)                            | 5 (63)                                 | 26 (48)                                    |
| Dialysis as comorbidity, n (%)                    | 2 (25)                                 | 8 (15)                                     |
| Risk factor Diabetes, n (%)                       | 1 (13)                                 | 12 (22)                                    |
| Risk factor Hypertension, n (%)                   | 6 (75)                                 | 36 (67)                                    |
| Risk factor Active smoker, n (%)                  | 6 (75)                                 | 23 (43)                                    |
| Risk factor Lipidemia, n (%)                      | 6 (75)                                 | 31 (57)                                    |
| Risk factor Overweight, n (%)                     | 5 (63)                                 | 36 (67)                                    |
| Family history of CVD*, n (%)                     | 1 (13)                                 | 13 (24)                                    |
| ACE* inhibitors, n (%)                            | 8 (100)                                | 45 (83)                                    |
| Aldosterone antagonists, n (%)t                   | 3 (38)                                 | 33 (61)                                    |
| Betablockers, n (%)                               | 8 (100)                                | 53 (98)                                    |
